# Supplementary material for: The prevalence and physiological impacts of centrilobular and paraseptal emphysema on computed tomography in smokers with preserved ratio impaired spirometry
Source: PubMed Central journal article supplement — ERJ Open Res. 2022 Jun 27;8(2):00063-2022. doi: 10.1183/23120541.00063-2022 (PMC9234440; doi:10.1183/23120541.00063-2022), 2022-06-27
Supplement: 00063-2022.SUPPLEMENT.pdf [file 00063-2022.SUPPLEMENT.pdf]

## Supplemental Materials

### The prevalence and physiological impacts of centrilobular and paraseptal emphysema on CT in smokers with Preserved Ratio Impaired Spirometry

#### Author names and affiliations:

Yusuke Shiraishi<sup>1,2,\*</sup>, Takafumi Shimada<sup>3,\*</sup>, Naoya Tanabe<sup>1,†</sup>, Kunihiko Terada<sup>4</sup>, Ryo Sakamoto<sup>5</sup>, Tomoki Maetani<sup>1</sup>, Hiroshi Shima<sup>1</sup>, Fumi Mochizuki<sup>3</sup>, Tsuyoshi Oguma<sup>1</sup>, Kaoruko Shimizu<sup>6</sup>, Susumu Sato<sup>1</sup>, Shigeo Muro<sup>1,7</sup>, Nobuyuki Hizawa<sup>8</sup>, Motonari Fukui<sup>2</sup>, Hiroaki Iijima<sup>3</sup>, Izuru Masuda<sup>9</sup>, Toyohiro Hirai<sup>1</sup>

1. Department of Respiratory Medicine, Graduate School of Medicine, Kyoto University, 54 Kawahara-cho, Shogoin, Sakyo-ku, Kyoto 606-8507, Japan
2. Respiratory Disease Center, Kitano Hospital, The Tazuke Kofukai Medical Research Institute, 2-4-20 Ohgimachi, Kita-ku, Osaka 530-8480, Japan
3. Department of Respiratory Medicine, Tsukuba Medical Center, 1-3-1 Amakubo, Tsukuba, Ibaraki 305-8558, Japan
4. Terada Clinic, Respiratory Medicine and General Practice, 3-6 Joutoumachigokenya, Himeji, Hyogo 670-0849, Japan
5. Department of Diagnostic Imaging and Nuclear Medicine, Graduate School of Medicine, Kyoto University, 54 Kawahara-cho, Shogoin, Sakyo-ku, Kyoto 606-8507, Japan
6. Department of Respiratory Medicine, Faculty of Medicine, Hokkaido University, Kita 15, Nishi 8, Kita-ku, Sapporo, Hokkaido 060-0808, Japan
7. Respiratory Medicine, Nara Medical University, 840 Shijo-cho, Kashihara, Nara 634-8522, Japan
8. Department of Pulmonary Medicine, University of Tsukuba, 1-1-1 Tennodai, Tsukuba, Ibaraki 305-8575, Japan
9. Medical examination center, Takeda Hospital, 277 Aburanokoji-cho, Shimogyo-ku, Kyoto 600-8231, Japan

\*YS and TS contributed equally to this work.

## **Supplemental Methods**

### **Study subjects**

This study retrospectively evaluated data of spirometry and full inspiratory chest CT. Non-smokers and smokers aged 40 years or older who underwent chest CT for lung cancer screening and spirometry without bronchodilator were consecutively enrolled at four facilities and the eligibility for the present analyses was assessed. The exclusion criteria were 1) a history of lung resection, 2) chest CT abnormalities extending to more than one lobe (such as consolidations, atelectasis, tumors, pneumothorax and thoracic deformity), 3) missing information on smoking status or light-smokers (< 10 pack-years), 4) more than 90 days between spirometry and CT scanning, and 5) insufficient inspiratory chest CT defined as  $FVC > TLC_{CT}$ . In the Tsukuba Medical Center, total 770 subjects underwent chest CT from November 2019 to September 2021. Nine subjects had abnormal CT findings or insufficient inspiratory CT, 155 subjects were missing demographic data, and 27 subjects were light-smoker. Ultimately, 579 subjects completed CT analyses. In the Kitano Hospital, total 356 subjects underwent chest CT for lung cancer screening from August 2012 to June 2014. Eleven subjects lacked demographic data, 13 subjects had abnormal CT findings or insufficient inspiratory CT, 4 subjects failed spirometry, and 30 were light-smokers. In the Takeda Hospital, total 885 subjects underwent chest CT from April 2016 to November 2020. Thirty subjects had abnormal CT findings or insufficient inspiratory chest CT, and 90 subjects were light-smokers. In the fourth facility (Terada Clinic, Respiratory Medicine and General Practice, Himeji), total 340 outpatients or subjects underwent chest CT for lung cancer screening from October 2018 to August 2020. Sixty-six subjects lacked demographic data, 41 subjects had abnormal CT findings or insufficient inspiratory CT, 42 subjects performed spirometry more than 90 days apart from chest CT scanning and 14 subjects were light-smokers.

### **Visual emphysema assessments**

Six CT-experienced pulmonologists with at least 5-year experiences and a chest radiologist with 15-year experience performed visual emphysema analysis based on the Fleischner Society classification system [1]. CLE was classified as trace, mild, moderate, confluent or advanced destructive, while PSE was classified as mild or substantial [1]. The category of panlobular emphysema was not used in this study, as it is applied to patients with  $\alpha$ 1-antitrypsin deficiency [1]. Before assessing visual emphysema score in the study population, the analysts scored training CT datasets and substantial discordance was reviewed by the analysts to obtain consensus. Each CT scan was assessed by two analysts without knowledge of clinical information. When the assessment was disagreed among them, the final decisions was made by a chest radiologist. The images were viewed at window width 700 Hounsfield Unit and window level -750 Hounsfield Unit. The CT slice thickness was 0.5 to 1.25 mm. The weighted kappa coefficient was calculated for the severity of CLE and PSE. The severity of CLE (none/trace/mild/moderate/confluent/advanced destructive) was weighted from 0 to 5, and that of PSE (none/mild/substantial) was weighted from 0 to 2.

### **Reference**

- [1] Lynch DA, Austin JHM, Hogg JC, et al. CT-Definable Subtypes of Chronic Obstructive Pulmonary Disease: A Statement of the Fleischner Society. *Radiology*. 2015 Oct 11;277(1):192–205. doi: 10.1148/radiol.2015141579

**Supplemental Table 1. Observer agreement for visual CT assessment**

| Observer                 | No. of chest CT scans | PSE agreement | Weighted kappa coefficient for PSE | CLE agreement | Weighted kappa coefficient for CLE |
|--------------------------|-----------------------|---------------|------------------------------------|---------------|------------------------------------|
| Observer 1 vs Observer 2 | 578                   | 97.8 %        | 0.94                               | 99.0 %        | 0.99                               |
| Observer 3 vs Observer 4 | 874                   | 90.2 %        | 0.73                               | 90.5 %        | 0.83                               |
| Observer 3 vs Observer 5 | 246                   | 85.0 %        | 0.81                               | 76.8 %        | 0.83                               |
| Observer 3 vs Observer 6 | 120                   | 85.8 %        | 0.81                               | 70.0 %        | 0.90                               |

PSE = paraseptal emphysema, CLE = centrilobular emphysema

**Supplemental Table 2. Subject's characteristics who underwent inspiratory and expiratory chest CT**

|                                 |             |
|---------------------------------|-------------|
| No. of subjects                 | 67          |
| Age (years)                     | 70.3 ± 11.4 |
| No. of males *                  | 56 (83.6%)  |
| BMI (kg/m <sup>2</sup> )        | 23.1 ± 4.3  |
| Smoking status, current *       | 30 (44.8%)  |
| Pack-years, ≥ 20 pack-year *    | 59 (88.1%)  |
| FVC (predicted %)               | 82.1 ± 20.9 |
| FEV <sub>1</sub> (predicted %)  | 72.0 ± 27.2 |
| FEV <sub>1</sub> /FVC           | 0.67 ± 0.14 |
| TLC <sub>CT</sub> (predicted %) | 88.3 ± 13.8 |
| FVC/TLC <sub>CT</sub> (%)       | 54.9 ± 15.7 |
| Lung function categories        |             |
| Normal spirometry *             | 18 (26.9%)  |
| PRISm *                         | 14 (20.9%)  |
| Airflow limitation *            | 35 (52.2%)  |

Except where indicated, numbers are means ± standard deviations.

BMI = body mass index, FVC = forced vital capacity, FEV<sub>1</sub> = forced expiratory volume in 1 second, TLC<sub>CT</sub> = total lung capacity measured on CT, FVC/TLC<sub>CT</sub> = ratio of forced vital capacity to total lung capacity measured on CT, PRISm = preserved ratio impaired spirometry

\*Data are numbers of subjects, with percentages in parentheses.

**Supplemental Table 3. Correlation between FVC/TLC<sub>CT</sub> and inspiratory-expiratory CT air-trapping indexes**

| Variables                                          | Correlation coefficient | P value |
|----------------------------------------------------|-------------------------|---------|
| Expiratory low attenuation volume (%)              | -0.55                   | <0.01   |
| Expiratory mean lung density (HU)                  | 0.56                    | <0.01   |
| Expiratory and inspiratory mean lung density ratio | -0.51                   | <0.01   |

Correlation between FVC/TLC<sub>CT</sub> and other CT indexes were calculated with Pearson's correlation test. FVC/TLC<sub>CT</sub> = ratio of forced vital capacity to total lung capacity measured on CT, HU = Hounsfield Unit
